# Supplementary material
Source: publisher site journal article supplement (https://www.spandidos-publications.com/6676/downloadSupplementary)
Supplement: Supplementary file 1 [file downloadSupplementary]

Video S1. Shimodaira-Taniguchi conization method.
